# Supplementary material for: Helicobacter pylori Eradication Therapy Is Effective as the Initial Treatment for Patients with H. pylori-Negative and Disseminated Gastric Mucosa-Associated Lymphoid Tissue Lymphoma
Source: PubMed Central journal article supplement — Gut Liver. 2016 Apr 28;10(5):706–13. doi: 10.5009/gnl15510 (PMC5003192; doi:10.5009/gnl15510), 2016-04-28
Supplement: GNL-10-706_suppl.2.pdf [file GNL-10-706_suppl.2.pdf]

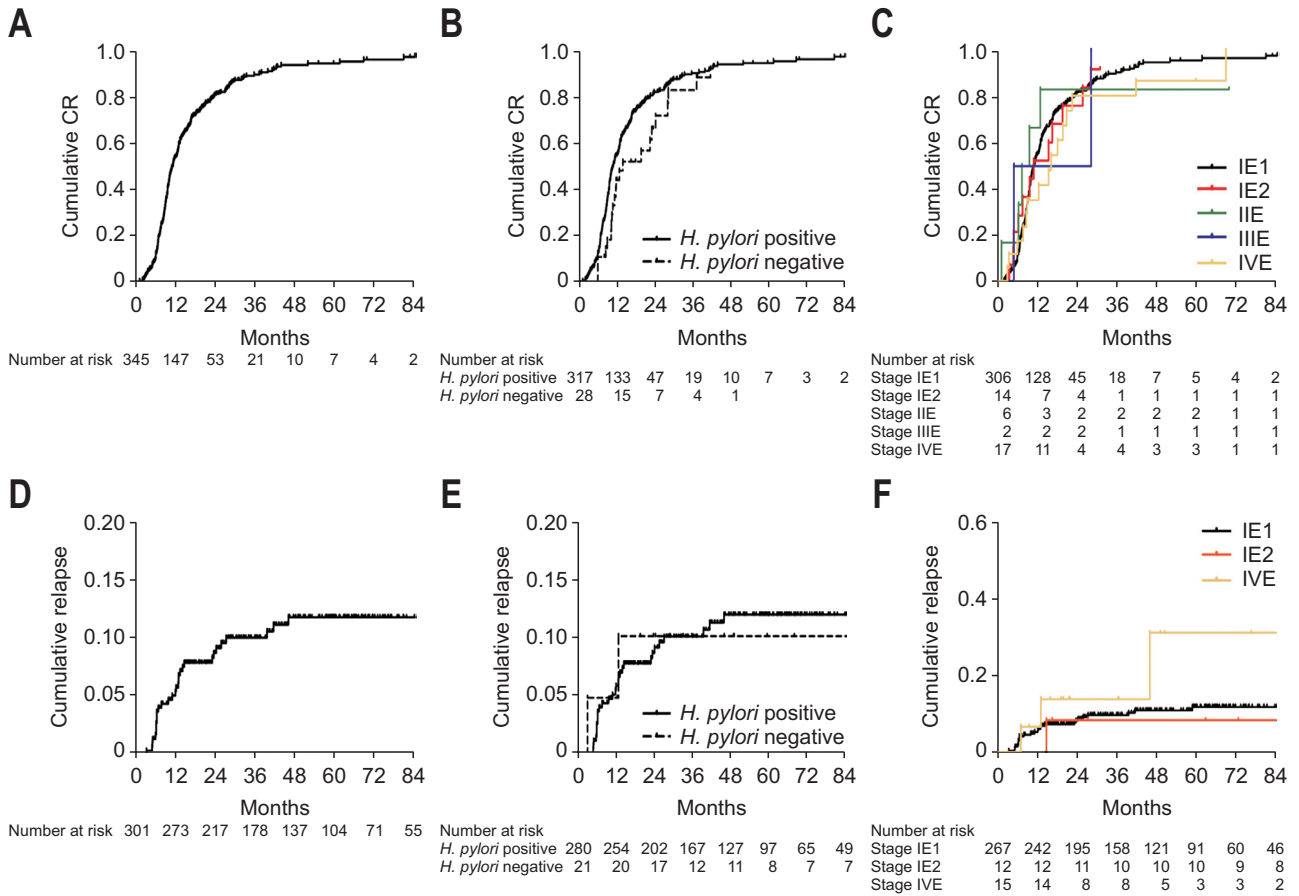

**Supplementary Fig. 2.** The time required to achieve of complete remission (CR) and the time to relapse after CR in patients with gastric mucosa-associated lymphoid tissue (MALT) lymphoma. (A) Cumulative CR rate. The median time to CR was 9.9 months. (B) The cumulative CR rate according to *Helicobacter pylori* infection status (log-rank,  $p=0.079$ ). The median time to CR was 9.8 months for *H. pylori*-positive patients and 11.5 months for *H. pylori*-negative patients. (C) The cumulative CR rate according to stage. The time to CR did not differ based on the disease stage (log-rank,  $p=0.831$ ). (D) The cumulative relapse rate. The median time to relapse was 11.5 months. (E) The cumulative relapse rate according to *H. pylori* infection status (log-rank,  $p=0.898$ ). The median time to relapse was 11.5 months for *H. pylori*-positive patients and 8.1 months for *H. pylori*-negative patients. (F) The cumulative relapse rate according to disease stage. The time to relapse did not differ among the disease stages (log-rank,  $p=0.579$ ).
